# Supplementary material
Source: PubMed Central journal article supplement (PMC8092741)
Supplement: JCM.02026-20-s0001.pdf [file JCM.02026-20-s0001.pdf]

# 1 Supplemental Figures and Figure Legends

## 2 Figure S1

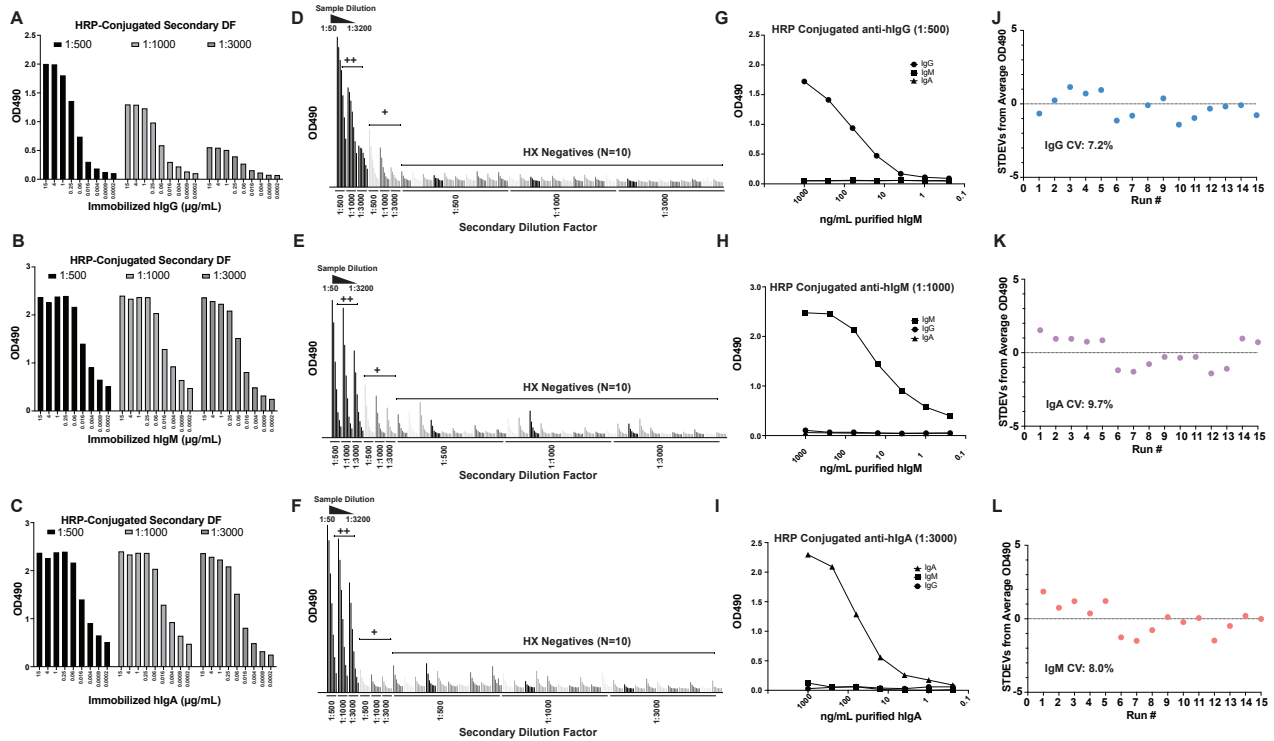

3  
4 **Figure S1 Optimization of detection reagents and precision analysis.** (A-C) Different  
5 dilutions (1:500, 1:1000, and 1:3000) of HRP-conjugated anti human IgG antibody were  
6 tested using purified human IgG, IgA and IgM from human serum (Sigma) immobilized  
7 on high bind ELISA plates. (D) Serum dilutions of 1:50 to 1:3200 with different conjugate  
8 dilutions were tested in a selection of historical negative and PCR-confirmed COVID-19  
9 samples with high and intermediate levels of reactivity in each assay. Based on the above  
10 data and the known normal levels of total serum IgA/M (60-400mg/dL) to be in a range  
11 approximately half that of IgG (700-1,500 mg/dL), a serum/plasma dilution of 1:100 was  
12 selected for IgA and IgM assays while a dilution of 1:200 was selected for the IgG assay.  
13 Conjugate dilutions of 1:500 for IgG, 1:1000 for IgM, and 1:3000 for IgA were selected  
14 based on retention of signal over the dilutions tested in D-F and the level of background

15 observed in historical negative samples. Using the selected parameters, all three assays  
16 exhibited background OD values in the range of 0.04-0.07. (G-H) Analysis of conjugate  
17 specificity at chosen dilutions using purified human IgG, IgA, and IgM. (J-L) Levy-  
18 Jennings analysis for single dilution SARS CoV-2 IgG, IgA, and IgM serology tests over  
19 15 independent runs.

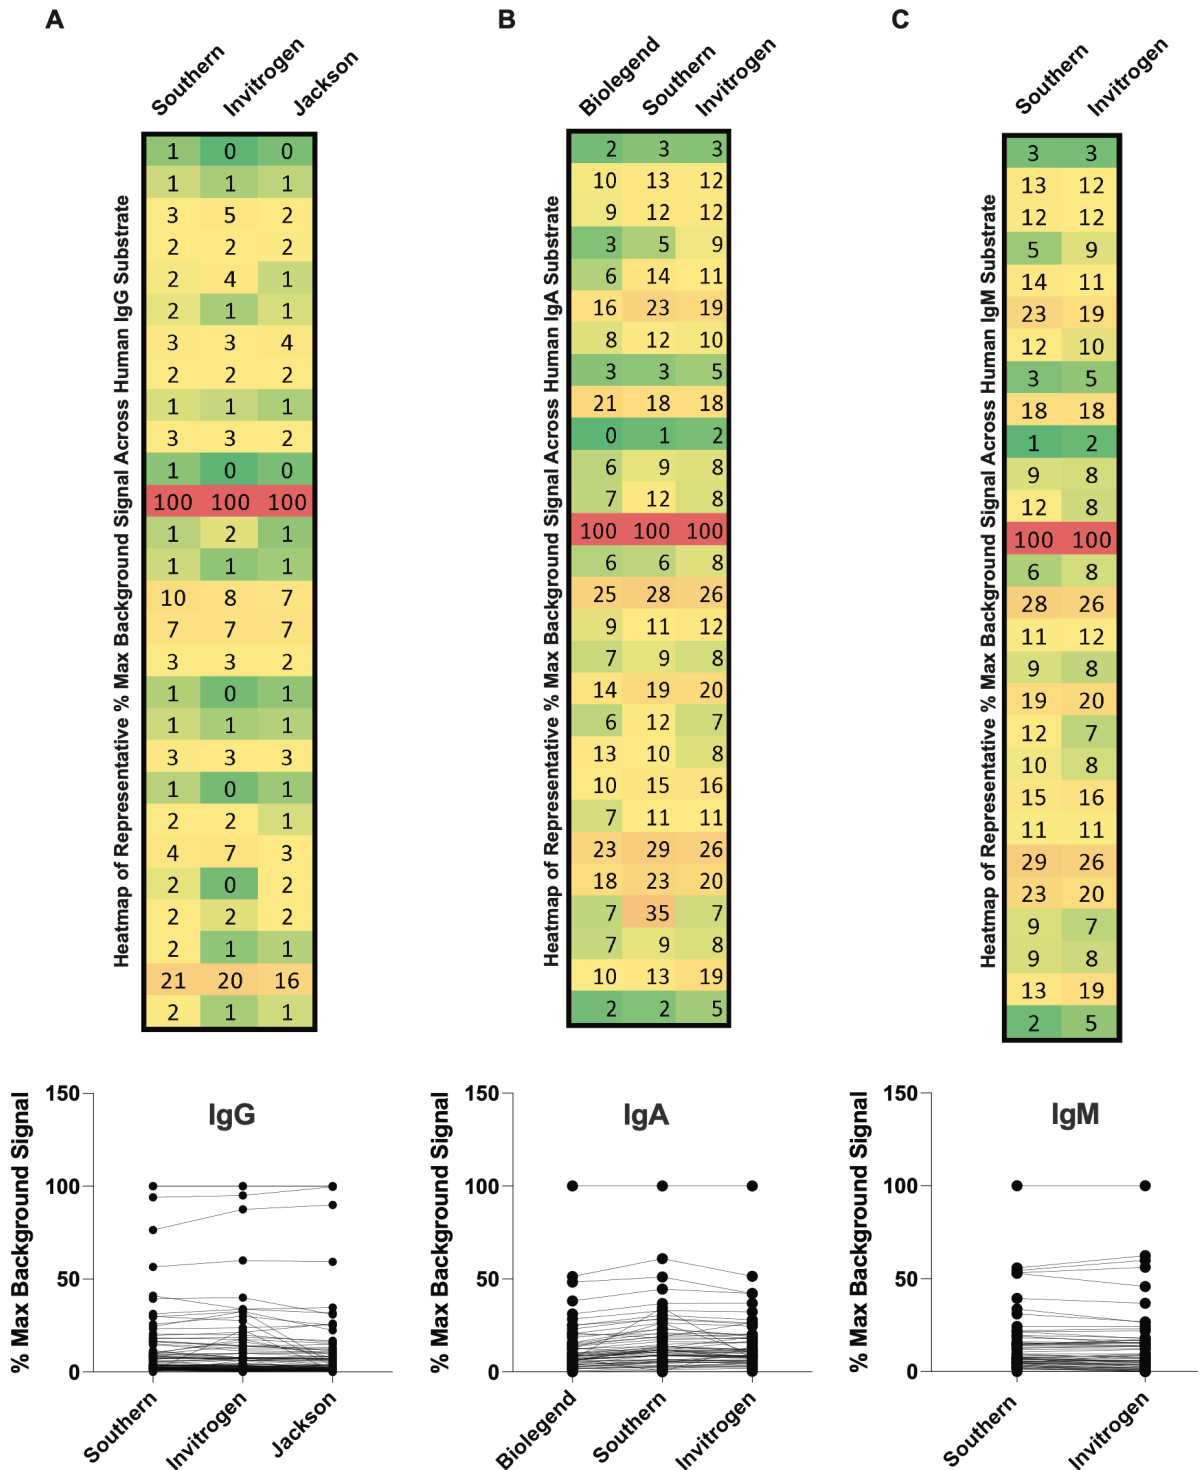

21 **Figure S2. Comparison of commercial detection reagents in pre-pandemic serum samples.**

22 (A-C) Pre-pandemic samples from healthy blood donors and patients being assessed for infection

23 by other pathogens were analyzed by RBD ELISA using HRP detection reagents from multiple

24 companies (N=103 samples for IgG; 63 for IgA and IgM). To assess overall agreement between  
25 detection reagents, signal intensity relative to maximum background signal observed for each  
26 conjugate in the sample set is plotted and connected for each sample across the tested secondary  
27 reagents. Heatmaps showing the intensity of background signal relative to the maximum for each  
28 conjugate are shown for a representative sample set below each plot.

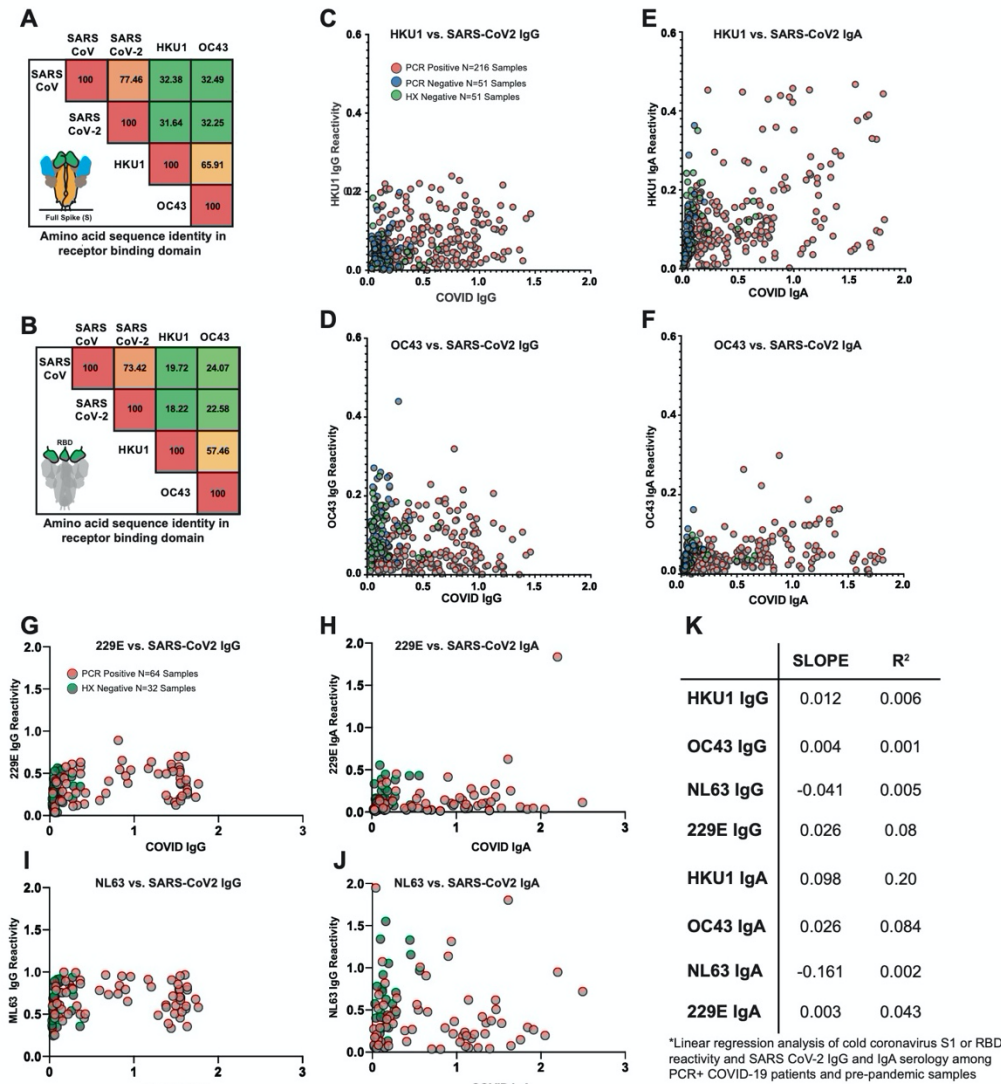

47 **Figure S3 Correlative analysis of SARS-CoV-2 RBD serology results with beta and**  
 48 **alphacoronavirus S1 and RBD ELISA reactivity. (A-B) Amino acid sequence comparison of**  
 49 **full-length spike protein (A) and the receptor binding domain (RBD) (B) of human zoonotic**  
 50 **coronaviruses SARS-CoV and SARS-CoV-2 with endemic human cold-causing**  
 51 **betacoronaviruses OC43 and HKU1. (C-E) OD values from the COVID-19 RBD-ELISA are plotted**  
 52 **against reactivity in an ELISA using immobilized S1 domain from OC43 or HKU1 for a subset of**  
 53 **samples from PCR positive, PCR negative, and historical pre-pandemic samples. (G-H) A similar**  
 54 **analysis was performed using recombinant receptor binding domains from human**

55 alphacoronaviruses 229E and NL63 using a subset of PCR positive and historical negative  
56 samples. (K) Slopes and  $R^2$  values from linear regression analyses of SARS CoV-2 RBD ELISA  
57 OD values against reactivity in each cold-coronavirus assay.



A

| PCR + |         |     |     |                          |            |     |     |     |
|-------|---------|-----|-----|--------------------------|------------|-----|-----|-----|
| #     | Samples | Age | Sex | Severity at Presentation | Intubation | IgG | IgA | IgM |
| 1     | 4       | 65  | M   | (1)                      | YES        | 1   | 1   | 1   |
| 2     | 16      | 42  | M   | (3)                      | YES        | 1   | 1   | 1   |
| 3     | 30      | 87  | M   | (2)                      | YES        | 1   | 1   | 1   |
| 4     | 33      | 76  | M   | (2)                      | YES        | 1   | 1   | 1   |
| 5     | 25      | 62  | M   | (2)                      | YES        | 1   | 1   | 1   |
| 6     | 1       | 71  | F   | (2)                      | YES        | 1   | 1   | 1   |
| 7     | 2       | 77  | M   | (1)                      | YES        | 1   | 1   | 1   |
| 8     | 1       | 67  | F   | (1)                      | NO         | 1   | 1   | 1   |
| 9     | 4       | 81  | M   | (3)                      | NO         | 1   | 1   | 1   |
| 10    | 2       | 50  | M   | (3)                      | NO         | 1   | 1   | 1   |
| 11    | 5       | 28  | F   | (2)                      | YES        | 1   | 1   | 1   |
| 12    | 7       | 56  | F   | (3)                      | YES        | 1   | 1   | 1   |
| 13    | 1       | 38  | M   | (2)                      | NO         | 1   | 1   | 1   |
| 14    | 1       | 31  | M   | (1)                      | NO         | 1   | 1   | 1   |
| 15    | 2       | 63  | M   | (4)                      | YES        | 1   | 1   | 1   |
| 16    | 20      | 72  | M   | (3)                      | YES        | 1   | 1   | 1   |
| 17    | 6       | 70  | M   | (2)                      | YES        | 1   | 1   | 1   |
| 18    | 3       | 79  | M   | (1)                      | NO         | 1   | 1   | 1   |
| 19    | 2       | 93  | F   | (2)                      | NO         | 1   | 1   | 1   |
| 20    | 2       | 45  | M   | (1)                      | NO         | 1   | 1   | 1   |
| 21    | 7       | 55  | F   | (3)                      | NO         | 1   | 1   | 1   |
| 22    | 6       | 65  | F   | (2)                      | NO         | 1   | 1   | 1   |
| 23    | 3       | 68  | F   | (4)                      | YES        | 0   | 0   | 0   |
| 24    | 2       | 53  | F   | (1)                      | NO         | 0   | 0   | 0   |
| 25    | 2       | 76  | M   | (2)                      | NO         | 0   | 0   | 0   |
| 26    | 1       | 74  | M   | (4)                      | YES        | 1   | 0   | 0   |
| 27    | 3       | 68  | M   | (4)                      | YES        | 1   | 1   | 1   |
| 28    | 1       | 61  | F   | (2)                      | NO         | 1   | 0   | 0   |
| 29    | 1       | 37  | M   | (2)                      | NO         | 0   | 1   | 1   |
| 30    | 3       | 77  | F   | (2)                      | NO         | 0   | 0   | 1   |
| 31    | 3       | 85  | M   | (2)                      | NO         | 1   | 1   | 1   |
| 32    | 6       | 66  | M   | (2)                      | YES        | 1   | 1   | 1   |
| 33    | 19      | 22  | F   | (3)                      | YES        | 1   | 1   | 1   |
| 34    | 2       | 51  | M   | (1)                      | NO         | 0   | 0   | 0   |
| 35    | 2       | 77  | F   | (2)                      | YES        | 1   | 1   | 1   |
| 36    | 1       | 53  | M   | (2)                      | NO         | 1   | 0   | 0   |
| 37    | 2       | 27  | F   | (1)                      | NO         | 0   | 0   | 0   |
| 38    | 6       | 39  | F   | (2)                      | YES        | 1   | 1   | 1   |
| 39    | 2       | 89  | M   | (1)                      | YES        | 0   | 0   | 0   |
| 40    | 1       | 69  | M   | (2)                      | NO         | 1   | 1   | 1   |
| 41    | 1       | 80  | F   | (2)                      | NO         | 1   | 1   | 1   |
| 42    | 3       | 49  | F   | (2)                      | NO         | 0   | 0   | 0   |
| 43    | 1       | 53  | F   | (2)                      | NO         | 1   | 1   | 1   |
| 44    | 20      | 57  | M   | (3)                      | YES        | 1   | 1   | 1   |
| 45    | 3       | 76  | M   | (1)                      | NO         | 0   | 0   | 0   |
| 46    | 20      | 49  | M   | (2)                      | YES        | 1   | 1   | 1   |
| 47    | 5       | 61  | F   | (2)                      | YES        | 1   | 1   | 1   |
| 48    | 1       | 62  | M   | (2)                      | NO         | 1   | 0   | 0   |
| 49    | 16      | 96  | M   | (4)                      | YES        | 1   | 1   | 1   |
| 50    | 3       | 73  | M   | (2)                      | NO         | 1   | 1   | 1   |
| 51    | 3       | 82  | F   | (2)                      | YES        | 1   | 1   | 1   |
| 52    | 1       | 66  | F   | (2)                      | NO         | 1   | 1   | 1   |
| 53    | 20      | 63  | M   | (1)                      | NO         | 1   | 1   | 1   |
| 54    | 4       | 27  | F   | (2)                      | YES        | 1   | 1   | 1   |
| 55    | 20      | 90  | M   | (4)                      | YES        | 1   | 1   | 1   |
| 56    | 2       | 57  | M   | (2)                      | NO         | 1   | 0   | 0   |
| 57    | 4       | 57  | M   | (2)                      | YES        | 1   | 1   | 1   |
| 58    | 16      | 46  | M   | (4)                      | YES        | 1   | 1   | 1   |
| 59    | 5       | 51  | F   | (2)                      | NO         | 1   | 1   | 1   |
| 60    | 1       | 50  | F   | (2)                      | NO         | 0   | 0   | 0   |
| 61    | 20      | 89  | M   | (4)                      | YES        | 1   | 1   | 1   |
| 62    | 2       | 100 | M   | (2)                      | NO         | 1   | 0   | 0   |
| 63    | 1       | 38  | F   | (2)                      | NO         | 0   | 0   | 0   |
| 64    | 1       | 79  | F   | (1)                      | NO         | 0   | 0   | 0   |
| 65    | 10      | 58  | M   | (2)                      | YES        | 1   | 1   | 1   |
| 66    | 2       | 54  | M   | (3)                      | NO         | 1   | 1   | 1   |
| 67    | 2       | 92  | F   | (2)                      | NO         | 0   | 1   | 0   |
| 68    | 16      | 65  | M   | (2)                      | YES        | 1   | 1   | 1   |
| 69    | 13      | 69  | F   | (2)                      | YES        | 1   | 1   | 0   |
| 70    | 16      | 67  | M   | (2)                      | YES        | 1   | 1   | 1   |
| 71    | 2       | 65  | M   | (2)                      | NO         | 1   | 1   | 1   |
| 72    | 1       | 33  | M   | (2)                      | NO         | 0   | 0   | 0   |
| 73    | 10      | 91  | F   | (2)                      | NO         | 1   | 1   | 1   |
| 74    | 2       | 77  | F   | (2)                      | NO         | 1   | 1   | 1   |
| 75    | 2       | 70  | M   | (1)                      | YES        | 0   | 0   | 1   |
| 76    | 2       | 95  | F   | (1)                      | NO         | 0   | 1   | 1   |
| 77    | 15      | 88  | F   | (4)                      | YES        | 1   | 1   | 1   |
| 78    | 1       | 77  | F   | (2)                      | NO         | 0   | 0   | 0   |

B

| PCR - |         |     |     |                          |            |     |     |     |
|-------|---------|-----|-----|--------------------------|------------|-----|-----|-----|
| #     | Samples | Age | Sex | Severity at Presentation | Intubation | IgG | IgA | IgM |
| 1     | 2       | 63  | M   | (1)                      | NO         | 0   | 0   | 1   |
| 2     | 3       | 58  | F   | (1)                      | NO         | 0   | 0   | 0   |
| 3     | 3       | 50  | M   | (2)                      | NO         | 1   | 1   | 1   |
| 4     | 5       | 70  | F   | (2)                      | NO         | 0   | 0   | 0   |
| 5     | 12      | 55  | M   | (2)                      | YES        | 0   | 0   | 0   |
| 6     | 2       | 24  | M   | (4)                      | NO         | 0   | 0   | 0   |
| 7     | 3       | 47  | M   | (4)                      | YES        | 0   | 0   | 0   |
| 8     | 2       | 66  | F   | (2)                      | NO         | 0   | 0   | 1   |
| 9     | 1       | 60  | M   | (1)                      | NO         | 0   | 0   | 0   |
| 10    | 1       | 53  | F   | (2)                      | NO         | 0   | 0   | 0   |
| 11    | 3       | 61  | F   | (2)                      | NO         | 0   | 0   | 0   |
| 12    | 3       | 54  | M   | (2)                      | NO         | 0   | 0   | 0   |
| 13    | 12      | 67  | M   | (1)                      | NO         | 1   | 1   | 1   |
| 14    | 5       | 69  | F   | (2)                      | NO         | 0   | 0   | 1   |
| 15    | 3       | 47  | F   | (2)                      | NO         | 0   | 0   | 0   |
| 16    | 15      | 72  | M   | (4)                      | YES        | 1   | 1   | 0   |
| 17    | 9       | 44  | M   | (4)                      | YES        | 0   | 0   | 1   |
| 18    | 11      | 20  | M   | (4)                      | YES        | 0   | 0   | 0   |
| 19    | 14      | 67  | M   | (4)                      | NO         | 0   | 0   | 1   |
| 20    | 13      | 54  | F   | (1)                      | NO         | 0   | 0   | 0   |
| 21    | 3       | 66  | M   | (2)                      | NO         | 0   | 0   | 1   |
| 22    | 16      | 74  | F   | (1)                      | YES        | 0   | 0   | 0   |
| 23    | 14      | 75  | M   | (2)                      | NO         | 0   | 0   | 0   |
| 24    | 8       | 85  | F   | (2)                      | NO         | 1   | 1   | 0   |
| 25    | 6       | 66  | M   | (2)                      | NO         | 1   | 1   | 0   |
| 26    | 2       | 47  | F   | (1)                      | NO         | 0   | 0   | 0   |
| 27    | 3       | 96  | F   | (2)                      | NO         | 0   | 0   | 0   |
| 28    | 13      | 55  | M   | (4)                      | YES        | 1   | 0   | 1   |
| 29    | 4       | 69  | M   | (4)                      | YES        | 1   | 0   | 0   |
| 30    | 15      | 73  | M   | (1)                      | NO         | 0   | 0   | 0   |
| 31    | 4       | 34  | M   | (2)                      | NO         | 0   | 0   | 0   |
| 32    | 1       | 87  | F   | (2)                      | NO         | 0   | 0   | 0   |
| 33    | 4       | 76  | F   | (2)                      | NO         | 0   | 0   | 0   |
| 34    | 2       | 59  | M   | (2)                      | NO         | 0   | 0   | 0   |
| 35    | 11      | 57  | M   | (1)                      | NO         | 0   | 0   | 0   |
| 36    | 1       | 53  | M   | (1)                      | NO         | 1   | 0   | 0   |
| 37    | 11      | 70  | F   | (1)                      | NO         | 0   | 0   | 1   |
| 38    | 2       | 52  | F   | (1)                      | NO         | 0   | 0   | 0   |
| 39    | 1       | 54  | M   | (2)                      | NO         | 0   | 0   | 0   |
| 40    | 1       | 57  | F   | (2)                      | NO         | 0   | 0   | 0   |
| 41    | 1       | 52  | M   | (1)                      | NO         | 0   | 0   | 0   |
| 42    | 10      | 32  | M   | (4)                      | NO         | 1   | 0   | 0   |
| 43    | 3       | 39  | F   | (1)                      | NO         | 0   | 0   | 0   |
| 44    | 4       | 77  | M   | (1)                      | NO         | 0   | 0   | 0   |
| 45    | 4       | 40  | F   | (1)                      | NO         | 0   | 0   | 0   |
| 46    | 11      | 77  | M   | (1)                      | NO         | 0   | 0   | 0   |
| 47    | 4       | 48  | F   | (4)                      | YES        | 0   | 0   | 0   |
| 48    | 3       | 78  | F   | (4)                      | NO         | 0   | 0   | 0   |
| 49    | 2       | 88  | F   | (4)                      | NO         | 0   | 0   | 0   |
| 50    | 4       | 93  | F   | (2)                      | NO         | 0   | 0   | 1   |
| 51    | 2       | 84  | F   | (2)                      | NO         | 0   | 0   | 0   |
| 52    | 7       | 56  | M   | (4)                      | NO         | 0   | 0   | 0   |
| 53    | 1       | 57  | M   | (2)                      | NO         | 0   | 0   | 0   |
| 54    | 3       | 39  | F   | (4)                      | NO         | 0   | 0   | 1   |
| 55    | 3       | 50  | F   | (4)                      | NO         | 0   | 1   | 0   |
| 56    | 1       | 61  | F   | (4)                      | YES        | 0   | 0   | 0   |
| 57    | 1       | 76  | M   | (1)                      | NO         | 0   | 0   | 0   |
| 58    | 1       | 21  | F   | (1)                      | NO         | 0   | 0   | 0   |
| 59    | 2       | 80  | M   | (4)                      | YES        | 0   | 0   | 0   |
| 60    | 1       | 52  | M   | (2)                      | NO         | 0   | 0   | 0   |
| 61    | 1       | 41  | F   | (2)                      | NO         | 0   | 0   | 0   |

64

65 **Figure S5. Cohort and sampling characteristics of SARS-CoV-2 PCR+ and PCR- study**

66 **populations.** (A) Individual patients are tabulated by patient ID from the PCR-confirmed cohort

67 with sampling, age, sex, and basic clinical information along with the overall alpha response (ie.

68 whether any sample tested positive by a given assay in the column). Note that the majority of



69 individuals in this set who tested negative, had very little sampling and the available samples were  
70 collected early during infection (B) The same information as in A, but for the cohort of PCR  
71 negative individuals.
